# Supplementary material for: Exploring the binding mechanism of paraquat to DNA by a combination of spectroscopic, cellular uptake, molecular docking and molecular dynamics simulation methods
Source: Royal Society of Chemistry journal article supplement (doi:10.1039/c7nj01645j), 2017-01-01
Supplement: c7nj01645j1.pdf [file c7nj01645j1.pdf]

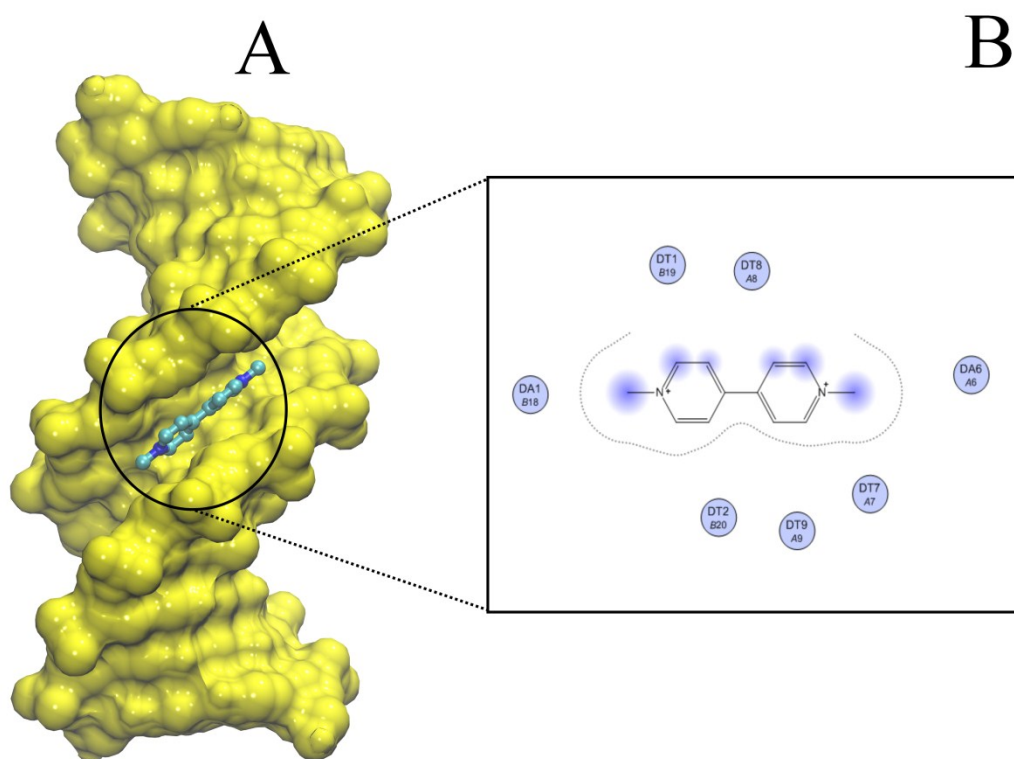

**Figure 1S** PQ docked in the minor groove of DNA. Different view of DNA docked conformation, **(A)** overview in surface model of PQ binding to DNA, **(B)** The docking pose of the PQ-DNA complex depicted in 2D scheme Images are generated using VMD and MOE
